# Supplementary material for: Non-integumentary melanosomes can bias reconstructions of the colours of fossil vertebrates
Source: PubMed Central journal article supplement (PMC6056411; doi:10.1038/s41467-018-05148-x), 2018-07-23
Supplement: 41467_2018_5148_MOESM1_ESM.pdf [file 41467_2018_5148_MOESM1_ESM.pdf]

## Description of Additional Supplementary Files

**File Name:** Supplementary Data 1

**Description:** List of specimens of adult frogs from the Libros biota with (y) and without (n) non-integumentary melanosomes. Dash indicates the presence / absence of non-integumentary melanosomes could not be determined for that specimen, usually because the torso is obscured by sediment.
